# Supplementary material for: A time-course analysis of changes in cerebral metal levels following a controlled cortical impact
Source: Royal Society of Chemistry journal article supplement (doi:10.1039/c5mt00234f), 2015-12-13
Supplement: c5mt00234f1.pdf [file c5mt00234f1.pdf]

**Supplementary Information for:**

**A time-course analysis of changes in cerebral metal levels following a controlled cortical impact**

Stuart D. Portbury, Dominic J. Hare, Charlotte Sgambelloni, David I. Finkelstein and Paul A. Adlard

**Table 1:** Iron concentration data ( $\mu\text{g g}^{-1}$ ). IPS = ipsilateral (injury) side; Contra = contralateral (control) side.

| <i>Time point</i> | <i>ROI1</i> |        | <i>ROI2</i> |        | <i>ROI3</i> |        | <i>Entire hemisphere</i> |        |
|-------------------|-------------|--------|-------------|--------|-------------|--------|--------------------------|--------|
|                   | IPS         | Contra | IPS         | Contra | IPS         | Contra | IPS                      | Contra |
| <i>24 hours</i>   | 7.547       | 6.651  | 5.975       | 5.625  | 5.901       | 5.767  | 6.055                    | 5.527  |
|                   | 4.802       | 4.636  | 4.968       | 4.641  | 5.072       | 4.489  | 4.956                    | 4.564  |
|                   | 13.998      | 10.768 | 9.311       | 9.618  | 4.202       | 4.510  | 9.893                    | 9.603  |
|                   | 4.453       | 4.768  | 4.385       | 4.367  | 4.547       | 4.485  | 4.461                    | 4.476  |
|                   | 9.221       | 5.016  | 3.968       | 4.804  | -           | -      | 5.853                    | 4.664  |
| <i>72 hours</i>   | 18.560      | 7.250  | 20.206      | 4.962  | 6.741       | 5.971  | 12.957                   | 5.919  |
|                   | 24.265      | 5.416  | 6.091       | 5.021  | 4.947       | 4.88   | 9.871                    | 4.874  |
|                   | 26.155      | 4.896  | 4.546       | 3.950  | 4.072       | 3.506  | 10.024                   | 3.872  |
|                   | 11.530      | 6.235  | 7.843       | 6.121  | 6.742       | 6.662  | 7.968                    | 6.370  |
| <i>7 days</i>     | 9.474       | 5.010  | 10.836      | 4.098  | 6.458       | 5.745  | 8.640                    | 6.547  |
|                   | 12.385      | 4.989  | 7.585       | 4.72   | 6.485       | 5.207  | 8.153                    | 6.276  |
|                   | 10.673      | 5.938  | 8.519       | 4.756  | 6.853       | 5.312  | 8.190                    | 7.051  |
|                   | 20.719      | 7.309  | 18.581      | 5.523  | 9.578       | 5.602  | 15.874                   | 10.148 |
| <i>14 days</i>    | 8.465       | 4.960  | 4.916       | 4.353  | 4.572       | 4.497  | 5.629                    | 4.480  |
|                   | 44.263      | 6.394  | 11.311      | 5.485  | 7.530       | 5.372  | 14.45                    | 5.427  |
|                   | 12.224      | 5.498  | 9.046       | 4.952  | 8.562       | 5.654  | 9.841                    | 5.398  |
|                   | 8.866       | 5.045  | 8.261       | 5.718  | 7.948       | 6.845  | 8.271                    | 6.080  |
|                   | 5.794       | 6.055  | 3.866       | 5.301  | 4.446       | 4.057  | 4.607                    | 4.698  |
| <i>28 days</i>    | 45.612      | 6.903  | 27.152      | 5.507  | 7.320       | 5.600  | 21.596                   | 5.837  |
|                   | 12.801      | 6.887  | 12.878      | 4.981  | 7.958       | 5.115  | 11.772                   | 5.176  |
|                   | 7.752       | 8.110  | 6.055       | 6.475  | 6.838       | 6.954  | 6.758                    | 6.919  |
|                   | 36.617      | 13.281 | 9.737       | 8.507  | 7.298       | 7.685  | 13.326                   | 8.329  |

**Table 2:** Copper concentration data ( $\mu\text{g g}^{-1}$ ). IPS = ipsilateral (injury) side; Contra = contralateral (control) side.

| <i>Time point</i> | <i>ROI1</i> |        | <i>ROI2</i> |        | <i>ROI3</i> |        | <i>Entire hemisphere</i> |        |
|-------------------|-------------|--------|-------------|--------|-------------|--------|--------------------------|--------|
|                   | IPS         | Contra | IPS         | Contra | IPS         | Contra | IPS                      | Contra |
| <i>24 hours</i>   | 1.497       | 1.692  | 1.639       | 1.709  | 1.423       | 1.325  | 1.716                    | 1.721  |
|                   | 0.831       | 1.128  | 1.058       | 1.176  | 1.748       | 1.718  | 1.104                    | 1.141  |
|                   | 1.328       | 1.621  | 1.593       | 1.575  | 2.120       | 2.247  | 1.458                    | 1.539  |
|                   | 1.679       | 2.447  | 1.801       | 2.040  | -           | -      | 1.923                    | 2.165  |
|                   | 0.888       | 1.831  | 1.074       | 1.840  | -           | -      | 1.184                    | 1.843  |
| <i>72 hours</i>   | 1.344       | 1.929  | 1.441       | 1.843  | 1.885       | 1.819  | 1.647                    | 1.870  |
|                   | 1.111       | 1.359  | 1.295       | 1.39   | 1.501       | 1.875  | 1.372                    | 1.407  |
|                   | 0.885       | 1.811  | 1.491       | 1.746  | 2.004       | 1.936  | 1.489                    | 1.701  |
|                   | 1.396       | 1.690  | 1.464       | 1.554  | 2.518       | 2.765  | 1.488                    | 1.668  |
| <i>7 days</i>     | 1.194       | 1.284  | 1.26        | 1.18   | 1.584       | 1.629  | 1.180                    | 1.204  |
|                   | 1.612       | 1.543  | 1.684       | 1.758  | 1.939       | 1.901  | 1.626                    | 1.573  |
|                   | 1.437       | 1.846  | 1.620       | 1.751  | 1.826       | 1.870  | 1.575                    | 1.742  |
|                   | 1.168       | 1.619  | 1.245       | 1.424  | 1.643       | 1.892  | 1.354                    | 1.444  |
|                   | -           | -      | -           | -      | 3.368       | 2.85   | -                        | -      |
| <i>14 days</i>    | 1.292       | 1.127  | 1.303       | 1.185  | 1.785       | 1.871  | 1.287                    | 1.246  |
|                   | 1.718       | 1.428  | 1.902       | 1.467  | 3.343       | 3.057  | 1.758                    | 1.613  |
|                   | 1.871       | 1.768  | 1.775       | 1.746  | 2.479       | 2.056  | 1.870                    | 1.773  |
|                   | 1.886       | 2.044  | 1.961       | 2.186  | 2.381       | 1.968  | 3.533                    | 2.288  |
|                   | -           | 2.605  | -           | 2.588  | -           | 3.197  | 2.131                    | 2.45   |
| <i>28 days</i>    | 2.229       | 1.961  | 2.553       | 1.946  | 2.173       | 2.072  | 2.434                    | 2.039  |
|                   | 2.678       | 1.776  | 1.729       | 1.547  | 1.667       | 1.501  | 1.897                    | 1.457  |
|                   | 2.488       | 2.625  | 2.073       | 2.103  | 1.895       | 1.918  | 2.180                    | 2.182  |
|                   | 3.443       | 2.913  | 3.162       | 2.568  | 2.382       | 2.253  | 3.047                    | 2.666  |
|                   | -           | -      | -           | -      | 1.974       | 2.445  | -                        | -      |

**Table 3:** Zinc concentration data ( $\mu\text{g g}^{-1}$ ). IPS = ipsilateral (injury) side; Contra = contralateral (control) side.

| <i>Time point</i> | <i>ROI1</i> |        | <i>ROI2</i> |        | <i>ROI3</i> |        | <i>Entire hemisphere</i> |        |
|-------------------|-------------|--------|-------------|--------|-------------|--------|--------------------------|--------|
|                   | IPS         | Contra | IPS         | Contra | IPS         | Contra | IPS                      | Contra |
| <i>24 hours</i>   | 4.820       | 3.681  | 4.671       | 3.561  | 3.838       | 3.454  | 4.155                    | 3.220  |
|                   | 3.981       | 3.886  | 3.960       | 3.870  | 3.131       | 2.868  | 3.614                    | 3.468  |
|                   | 7.013       | 7.100  | 6.949       | 6.226  | 5.942       | 5.646  | 6.417                    | 5.946  |
|                   | 4.038       | 4.033  | 4.181       | 4.138  | 3.559       | 3.897  | 3.867                    | 3.991  |
|                   | 2.369       | 3.881  | 2.767       | 4.019  | 3.125       | 3.671  | 2.755                    | 3.763  |
| <i>72 hours</i>   | 5.014       | 3.994  | 4.212       | 3.892  | 3.773       | 3.52   | 4.182                    | 3.781  |
|                   | 5.736       | 3.531  | 3.650       | 3.754  | 3.362       | 3.262  | 3.996                    | 3.360  |
|                   | 3.229       | 4.249  | 3.412       | 3.934  | 3.661       | 3.691  | 3.431                    | 3.832  |
|                   | 4.960       | 4.422  | 4.805       | 4.245  | 4.594       | 4.252  | 4.759                    | 4.257  |
| <i>7 days</i>     | 4.406       | 4.116  | 4.193       | 3.492  | 3.618       | 3.158  | 3.97                     | 3.362  |
|                   | 5.661       | 3.759  | 5.266       | 4.116  | 4.268       | 3.917  | 1.904                    | 3.914  |
|                   | 4.932       | 4.249  | 4.155       | 4.119  | 3.641       | 3.263  | 4.094                    | 3.741  |
|                   | 5.485       | 3.810  | 4.908       | 3.628  | 3.950       | 3.712  | 4.510                    | 3.654  |
| <i>14 days</i>    | 4.630       | 3.835  | 3.631       | 3.408  | 2.779       | 3.154  | 3.346                    | 3.297  |
|                   | 5.651       | 4.680  | 4.020       | 3.626  | 3.835       | 3.861  | 4.240                    | 3.774  |
|                   | 5.706       | 4.325  | 4.409       | 4.162  | 3.717       | 3.572  | 4.439                    | 3.945  |
|                   | 5.106       | 6.590  | 5.256       | 4.785  | 5.494       | 5.009  | 5.246                    | 5.126  |
|                   | 5.297       | 6.616  | 4.283       | 5.283  | 4.808       | 4.186  | 4.713                    | 4.854  |
| <i>28 days</i>    | 6.596       | 4.207  | 5.437       | 1.946  | 4.561       | 3.714  | 4.988                    | 3.841  |
|                   | 5.245       | 4.180  | 4.206       | 1.547  | 3.760       | 3.825  | 3.989                    | 3.801  |
|                   | 5.722       | 6.267  | 4.991       | 2.103  | 4.648       | 4.977  | 4.888                    | 5.369  |
|                   | 8.304       | 8.719  | 6.196       | 2.568  | 5.429       | 6.351  | 6.410                    | 6.682  |
